1 **Classical macrophage polarisation is limited by human  $\beta$ -defensin-3 via an**  
2 **autocrine IL-4 dependent process.**

3  
4  
5 Maria E. Candela<sup>1</sup>, David J.P. Allsop<sup>1</sup>, Roderick N. Carter<sup>2</sup>, Fiona Semple<sup>3</sup>, Fiona  
6 Kilanowski<sup>3</sup>, Sheila Webb<sup>3</sup>, David Taggart<sup>1</sup>, Henry J.W Mullan<sup>1</sup>, Brian J. McHugh<sup>1</sup>, David  
7 H. Dockrell<sup>1</sup>, Donald J. Davidson<sup>1</sup>, Judith E. Allen<sup>4</sup>, Stephen J. Jenkins<sup>1</sup>, Nicholas M.  
8 Morton<sup>2</sup> and Julia R. Dorin<sup>1\*</sup>

9  
10  
11 <sup>1</sup>Centre for Inflammation Research, Institute for Regeneration and Repair, The University  
12 of Edinburgh, Queen's Medical Research Institute, Edinburgh BioQuarter, Edinburgh,  
13 United Kingdom EH16 4TJ

14 <sup>2</sup>British Heart Foundation Centre for Cardiovascular Science, The University of  
15 Edinburgh, EH16 4TJ

16 <sup>3</sup>MRC Human Genetics Unit, Institute of Genetics and Molecular Medicine, The  
17 University of Edinburgh, EH4 2XU

18 <sup>4</sup> Lydia Becker Institute for Immunology & Infection, University of Manchester,  
19 Manchester, UK

20  
21  
22 **Keywords:** HBD3, macrophage polarisation, beta defensin, defensin, oxidative  
23 phosphorylation, GAPDH, Il4ra

24 \*to whom correspondence should be addressed: [Julia.dorin@ed.ac.uk](mailto:Julia.dorin@ed.ac.uk)

25  
26  
27  
28

29 **Abstract**

30  
31 Human  $\beta$ -defensin 3 (HBD3), is an anti-microbial host-defence peptide, that can rapidly  
32 enter macrophages to modulate TLR4 responses to lipopolysaccharide. However, the  
33 molecular mechanisms by which HBD3 exerts this anti-inflammatory influence remain  
34 unclear. Here, we show mice deleted for the orthologue of HBD3 have an increased  
35 acute lipopolysaccharide response *in vivo*. Furthermore, we found that HBD3 limited the  
36 response of macrophages to classical activation, and contemporaneously drove  
37 expression of IL-4. An increase in markers of alternative activation, and a change in  
38 metabolic flux was also observed. Consistent with these results, HBD3 enhanced the IL-4  
39 mediated polarisation of naïve macrophages. Finally, we demonstrate that the ability of  
40 HBD3 to limit macrophage classical activation requires IL-4R $\alpha$ . These data reveal a  
41 previously unrecognised role for HBD3 in influencing the polarisation state of  
42 macrophages to enable a state conducive for repair and resolution.

## 43 SYNOPSIS

44

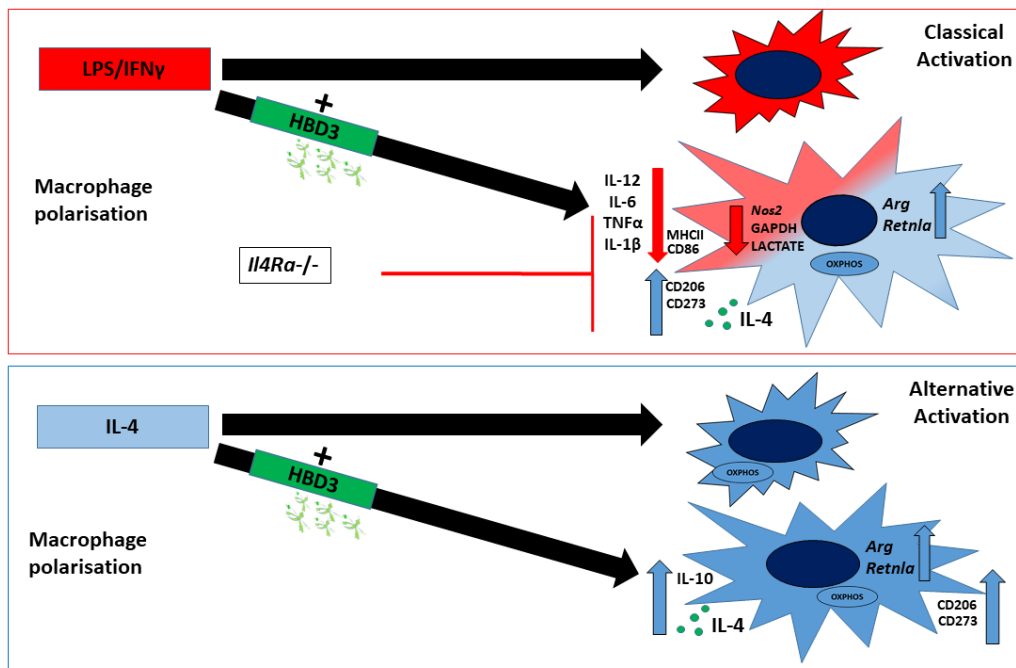

45

46

47

48

49

50

51

52

53

54

55

56

57

58

59

60

61

62

63

The anti-microbial host-defence peptide, Human  $\beta$ -defensin 3 (HBD3), is shown here to modulate the inflammatory response to classical activation by promoting alternative activation through IL-4R $\alpha$ , to enable a state conducive for repair and resolution.

- Knockout mice for the orthologous gene for HBD3, demonstrate increased acute lipopolysaccharide inflammatory response.
- HBD3 limited the classical activation of macrophages polarised with LPS/IFN $\gamma$  and drove expression of IL-4. Cells also displayed increase in alternative activation markers and promotion of oxidative phosphorylation.
- HBD3 enhanced the IL-4-mediated activation of naïve macrophages.
- The ability of HBD3 to limit macrophage classical activation and contemporaneously promote alternative activation required IL-4R $\alpha$ .

## 64 Introduction

65  
66 The  $\beta$ -defensins are a multigene family encoding antimicrobial, cationic, amphipathic  
67 peptides. They have a conserved structure stabilized by a canonical six cysteine motif  
68 and specific disulphide connectivities (Bauer *et al*, 2001; Wu *et al*, 2003). Their  
69 expression at surface epithelia is rapidly induced in response to inflammatory signals,  
70 and several are expressed in response to vitamin D, lipopolysaccharide (LPS) and/or  
71 interferon  $\gamma$  (IFN $\gamma$ ) (Duits *et al*, 2002; Edfeldt *et al*, 2010). HBD3, encoded by *DEFB103*,  
72 is one of many  $\beta$ -defensins present in humans. Although mice have species-specific  $\beta$ -  
73 defensin clades, *Defb14* is the clear orthologue of *DEFB103*, and the peptides are 64%  
74 identical at the amino acid level (Schutte *et al*, 2002). Defensins have been termed  
75 alarmins, as molecules that can activate and mobilise immune cells in response to  
76 danger (Yang *et al*, 2013). Indeed, both HBD3 and DEFB14 are chemo-attractive for  
77 macrophages through CCR2. In addition, when HBD3 is added to macrophages, it is  
78 detected inside the cell within ten minutes (Rohrl *et al*, 2010; Semple *et al*, 2011). It has  
79 been shown that HBD3 increases the endosomal TLR9 response to pathogen or self-  
80 DNA in plasmacytoid dendritic cells (Lande *et al*, 2015; Lee *et al*, 2019; McGlasson *et al*,  
81 2017; Rohrl *et al.*, 2010; Tewary *et al*, 2013), and the macrophage response to high  
82 molecular weight Poly(I:C) via the cytoplasmic MDA5 (Semple *et al*, 2015). However,  
83 HBD3 has a dichotomous behaviour, and in addition to amplifying the response to some  
84 pattern recognition receptor ligands, the cytokine response to other molecular patterns  
85 can be reduced (Shelley *et al*, 2020).

86 We have previously shown that HBD3 reduces the TLR4-dependent transcriptional  
87 signature and cytokine response to LPS *in vitro* and *in vivo* (Semple *et al*, 2010). The  
88 causative mechanism is unknown, but it is neither due to LPS neutralisation, nor the  
89 binding and blocking of TLR4 by the peptide. The evidence for this is twofold, firstly LPS  
90 stimulation of TLR4 and assembly of the MyD88 signalling hub (MyDDosome) is known  
91 to happen within minutes of TLR4 stimulation (Latty *et al*, 2018), and the suppressive  
92 effect of the defensin on cytokine production is still evident even when peptide is added  
93 up to 60 minutes after LPS exposure (Semple *et al.*, 2010). Secondly, NF- $\kappa$ B signalling  
94 induced by exogenous MyD88 expression and therefore independent of TLR4, is also  
95 reduced by HBD3 expression (Semple *et al.*, 2011).

96  
97 Here, we show that the serum cytokine response to *E.coli* LPS, is increased in mice with  
98 a targeted disruption of *Defb14*. In addition, we show that in the presence of HBD3 the  
99 degree of polarisation to classical activation by LPS and IFN $\gamma$  is reduced, and there is an  
100 increase in alternative activation. These changes are coincident with increased IL-4  
101 expression. Independently, HBD3 used in combination with IL-4 augments macrophage  
102 polarisation to alternative activation. A change in metabolic flux to oxidative  
103 phosphorylation is also observed when HBD3 is present in the classical activation  
104 polarisation, together with a reduction in expression of genes involved in aerobic  
105 glycolysis. Finally we show, that the effect of HBD3 on macrophage polarisation with  
106 LPS/IFN $\gamma$  is dependent on IL-4R $\alpha$ . This work extends the functional repertoire of  $\beta$ -  
107 defensins and provides mechanistic insights, with relevance for infection resolution and a  
108 return to homeostasis.

109

## 110 Results

111

### 112 ***HBD3 limits the pro-inflammatory M(LPS+IFN $\gamma$ ) polarisation phenotype of*** 113 ***macrophages in vitro and in vivo.***

114 We have previously demonstrated that *in vitro*, DEFB14 and HBD3 peptides suppress  
115 lipopolysaccharide (LPS) signalling in primary macrophages (Semple *et al.*, 2011). To  
116 determine if the effect of suppressing the pro-inflammatory cytokine response to LPS is  
117 relevant *in vivo*, we disrupted the *Defb14* gene using embryonic stem cell gene targeting  
118 (**Supplementary Fig.1**). We show here that, 90 minutes following LPS intraperitoneal  
119 injection, *Defb14*<sup>tm1a</sup> homozygotes had significantly greater increase in levels of IL-6 in  
120 their sera, compared to wild type animals (**Fig. 1a**). Thus indicating that in the absence of  
121 *Defb14* the acute response to LPS was increased *in vivo*. This emphasises the  
122 physiological relevance of  $\beta$ -defensin suppression of pro-inflammatory cytokines.  
123 We then exposed wild type, naïve bone marrow derived macrophages (BMDM) to the  
124 more potent classical activation stimulus of LPS and IFN $\gamma$  (termed here M(LPS/IFN $\gamma$   
125 (Murray *et al.*, 2014)), and followed this, with varying concentrations of HBD3 peptide.  
126 Macrophages polarised in the presence of (LPS/IFN $\gamma$ ) and HBD3 after 15 minutes  
127 (termed here M(LPS/IFN $\gamma$ +HBD3), secreted significantly less TNF- $\alpha$  after 18 hours (**Fig.**  
128 **1b**). The suppressive effect was not significant at peptide levels less than 2.5 $\mu$ g/ml, and  
129 was most potent at 10 $\mu$ g/ml of peptide. This effect of HBD3 was reduced at 20 $\mu$ g/ml and  
130 lost at 30 $\mu$ g/ml (**Supplementary Fig. 2a**), which may reflect the cytotoxic effect of HBD3  
131 on mammalian cells at higher concentrations (Leelakanok *et al.*, 2015). The effect was  
132 structure dependent as addition of a linear peptide with an equal charge but lacking a  
133 disulphide-stabilised structure, did not reduce the TNF- $\alpha$  cytokine response. For all future  
134 experiments we used 5 $\mu$ g/ml (1 $\mu$ M) HBD3.  
135 M(LPS/IFN $\gamma$ +HBD3) from mouse BM showed significantly reduced expression compared  
136 to M(LPS/IFN $\gamma$ ), of two key classical activation genes- *Nos2* (inducible nitric oxide  
137 synthase gene) and *Fpr2* (Formyl Peptide Receptor 2 gene) (**Fig. 1c**). The cytokine  
138 levels of TNF- $\alpha$ , IL-6 and IL-12 were also less in M(LPS/IFN $\gamma$ ) with HBD3, compared to  
139 without (**Fig. 1d**). As well as measuring less secreted IL-1 $\beta$ , we also detected less  
140 *Caspase 1* (*Casp1*) gene expression in M(LPS/IFN $\gamma$ +HBD3) implying inflammasome  
141 engagement was reduced in the presence of HBD3, consistent with a reduction in  
142 glycolysis (**Supplementary Fig. 2b**) and IL-4 involvement (Czimmerer *et al.*, 2018; Moon  
143 *et al.*, 2015). We also found peripheral blood monocyte derived macrophages (PBMDM)  
144 from healthy volunteer donors, stimulated with LPS/IFN $\gamma$ , showed a greater than ten-fold  
145 reduction of TNF- $\alpha$  and IL-6 when also in the presence of HBD3 (**Fig. 1e**). HBD3 alone,  
146 and/or IL-4 had no effect on the secretion of pro-inflammatory cytokines (**Fig 1d-e**). When  
147 culturing the mouse BMDM, we noticed that the population of M(LPS/IFN $\gamma$ +HBD3) had  
148 cells with the dendritic morphology characteristic of M(LPS/IFN $\gamma$ ) but also some more  
149 rounded cells reminiscent of IL-4 alternatively activated macrophages (Ploeger *et al.*,  
150 2013) (termed here M(IL-4)(Murray *et al.*, 2014)) (**Supplementary Fig. 2c**). To  
151 investigate this further, we examined markers for both classical and alternative activation  
152 states in the M(LPS/IFN $\gamma$ +HBD3) cell population.

153

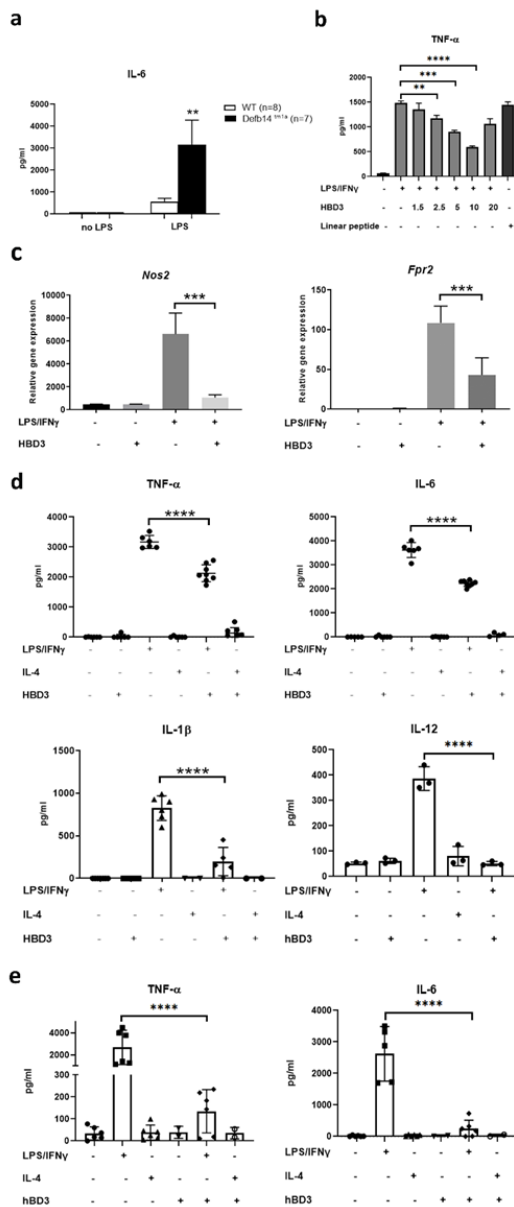

154

155

**Figure 1: Defensin HBD3 limits the classical inflammatory polarisation phenotype of macrophages in human and mouse in vitro and in vivo.**

BMDM polarised as shown with or without (5 ug/ml) HBD3 after 15-30 minutes (except B where concentrations are shown) for 18 hours.

**a:** IL-6 levels in serum of *Defb14*<sup>-/-</sup> and wild type mice 90 minutes after LPS injection. \*\* p<0.01.

**b:** TNF- $\alpha$  expression in supernatant of BMDMs M $\theta$  and M(LPS+IFN $\gamma$ ) treated with different HBD3 concentration (or 5 ug/ml of Linear Peptide) for 18 hours, measured by ELISA. Sample reference M(LPS+IFN $\gamma$ ), \*\*\*\* p<0.0001, \*\*\* p<0.001, \*\* p<0.01.

**c:** *Nos2* and *Fpr2* gene expression were measured by real time RT-PCR. Results are normalized to mRNA expression in naïve macrophages. \*\*\* p<0.001.

**d:** TNF- $\alpha$ , IL-6, IL-1 $\beta$  and IL-12 cytokine expression measured by ELISA. \*\*\*\* p<0.0001.

**e:** TNF- $\alpha$  and IL-6 cytokine expression measured by ELISA in human macrophages, polarized as shown, with or without (5 ug/ml) HBD3. \*\*\*\* p<0.0001.

Comparison were done with one-way ANOVA test.

156 ***HBD3 increases alternative activation markers in M(LPS+IFN $\gamma$ ) and augments M(IL-***  
157 ***4) polarisation.***

158  
159 The co-stimulatory marker CD86, and MHC II are expressed at high levels in  
160 M(LPS/IFN $\gamma$ ) macrophages (Van den Bossche *et al*, 2016), and we found these levels  
161 were significantly lower in cells polarised with LPS+IFN $\gamma$  followed by HBD3, with the  
162 number of double positive cells reducing by half (**Fig. 2a** and **Supplementary Fig 3a**). In  
163 contrast, the levels of markers associated with M(IL-4), such as CD273 (encoding  
164 programmed death ligand 2 (PDL2)) and CD206 (Mannose receptor) (Gundra *et al*, 2014;  
165 Huber *et al*, 2010) were increased significantly (91% of cells stained double positive for  
166 both) (**Fig. 2b** and **Supplementary Fig 3a**). IL-10 is known to be important in the TLR4  
167 response and is induced after 6 hours in pro-inflammatory macrophages to limit the pro-  
168 inflammatory activation of cells (Ip *et al*, 2017). At 18 hours, we found M(LPS/IFN $\gamma$ )  
169 expressed a high level of IL-10, and M(LPS/IFN $\gamma$ +HBD3) also had a strong IL-10  
170 response, but this was reduced in comparison to M(LPS/IFN $\gamma$ ) (**Fig 2c**). Conversely IL-10  
171 levels were significantly increased in M(IL-4+HBD3) compared to M(IL-4) (**Fig 2c**). We  
172 also observed an increase in gene expression of *I/4* in BMDM cells polarised with  
173 (LPS/IFN $\gamma$ +HBD3) compared to M(LPS/IFN $\gamma$ ) (**Fig 2d**). We found this was also true when  
174 we used the mouse macrophage cell line RAW 264.7, and cytokine levels of IL-4 were  
175 increased in supernatant from human peripheral blood monocyte derived macrophages  
176 treated with LPS/IFN $\gamma$ +HBD3 (**Fig 2d**). These results demonstrate that when  
177 macrophages are polarised with LPS/IFN $\gamma$  and HBD3, classical activation markers are  
178 reduced, but IL-4 expression and alternative activation markers (consistent with those  
179 present on M(IL-4)), are increased  
180



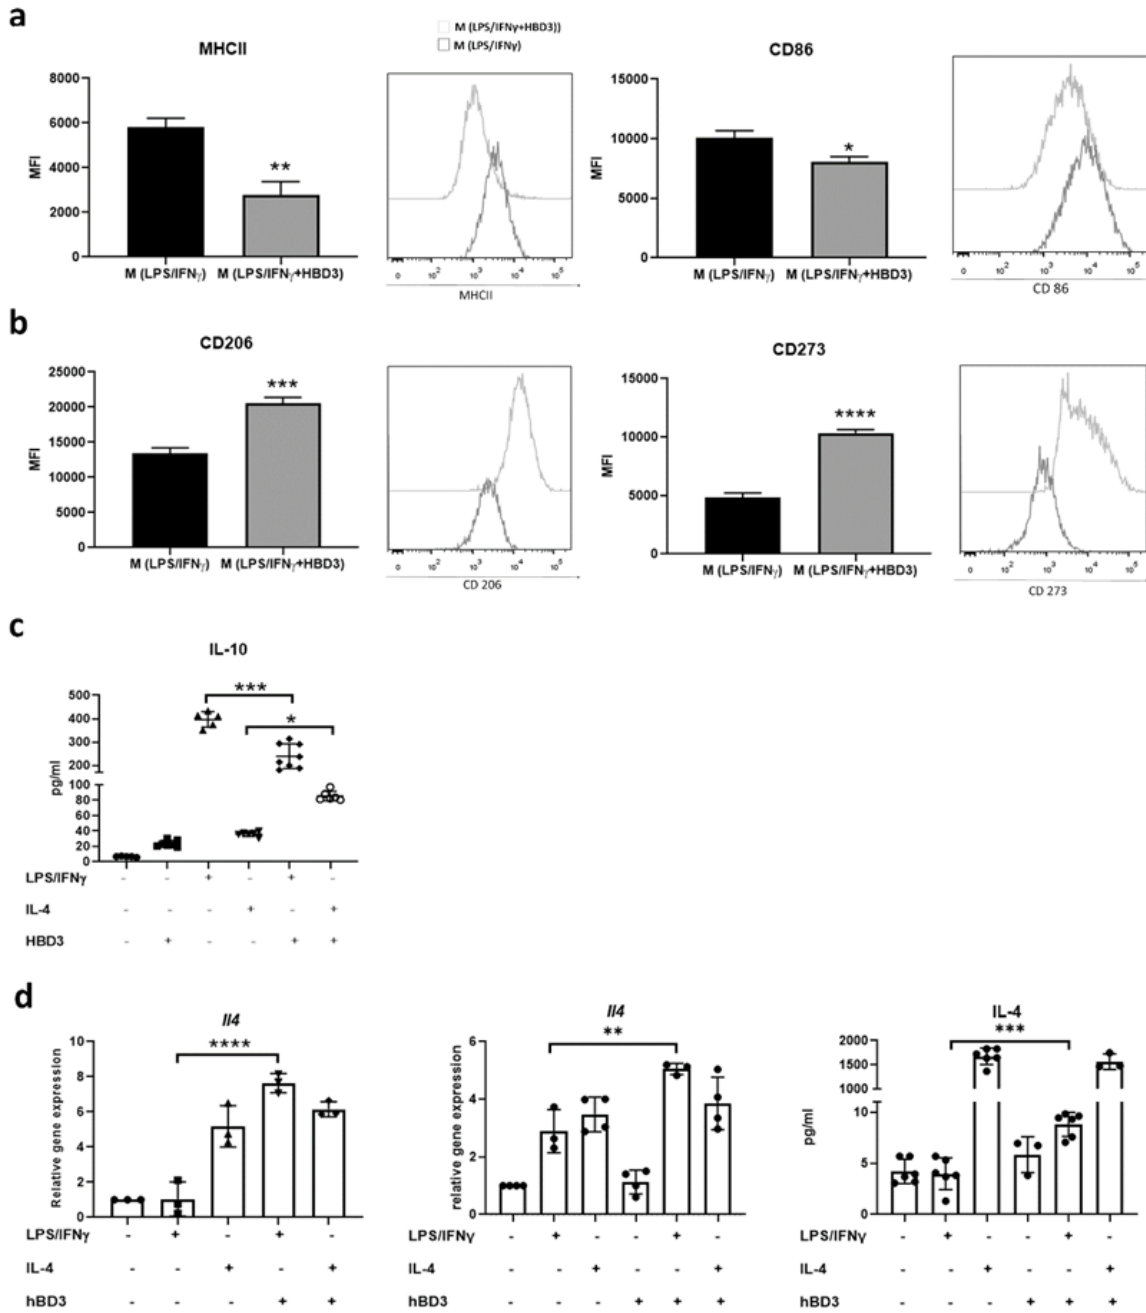

**Figure 2: Decreased pro-inflammatory and increased alternative activation markers in M (LPS+IFN $\gamma$ ) in presence of HBD3.**

BMDM (samples from Fig. 1c-d), RAW 264.7 cells and human PBMDM (samples from fig. 1e) were polarised for 18 hours with LPS+IFN $\gamma$  or IL-4 followed after 15-30 minutes +/- HBD3.

**a-b:** Representative histograms of geometric mean fluorescence intensity (MFI) of MHCII, CD86, CD206 and CD273 surface markers analysed by flow cytometry. See **S3a** for dot plot scattergrams.

**c:** IL-10 cytokine expression measured by ELISA.

**d:** *I/4* gene expression measured by real time where the results are normalized to mRNA expression of naive macrophages, in BMDM and RAW cells (left to right) and IL-4 cytokine in supernatant of human macrophages (far right).

Comparison were done with one-way ANOVA test, \*\*\*\* p<0.0001, \*\*\* p<0.001, \*\* p<0.01, \* p<0.05.



183 Given the ability of HBD3 to promote *Ii4* expression in M(LPS/IFN $\gamma$ ), we speculated that  
184 HBD3 could enhance IL-4 alternative activation of macrophages. *Arginase 1* (*Arg1*) and  
185 *Resistin like molecule alpha* (*Retnla*), were both expressed at higher levels in M(IL-  
186 4+HBD3) compared to M(IL-4), when 20ng of IL-4 was used for polarisation (**Fig. 3a**).  
187 Co-culture with HBD3 did not affect the high levels of macrophage expression of CD206  
188 or CD273 stimulated by 20ng/ml of IL-4 (**Fig. 3b**), however, this level of IL-4 may induce  
189 maximal activation, as has been shown in CD4+ Th2 cells (Perona-Wright *et al*, 2010).  
190 When we reduced the level of IL-4 stimulation to 5ng/ml or 10ng/ml, HBD3 induced a  
191 strong and significant augmentation of the gMFI of CD206 and CD273 and increase in  
192 the number of double positive cells (**Fig 3b** and **Supplementary Fig. 3b**). In addition,  
193 the fact that HBD3 augmented IL-4 polarisation of naïve BMDM to alternative activation,  
194 confirms again that the suppression of classical activation and increase in alternative  
195 activation markers LPS in response to LPS/IFN $\gamma$ , is not mediated through LPS  
196 neutralisation. We then investigated whether the presence of HBD3 influences the  
197 cellular metabolic programming of macrophages.

198

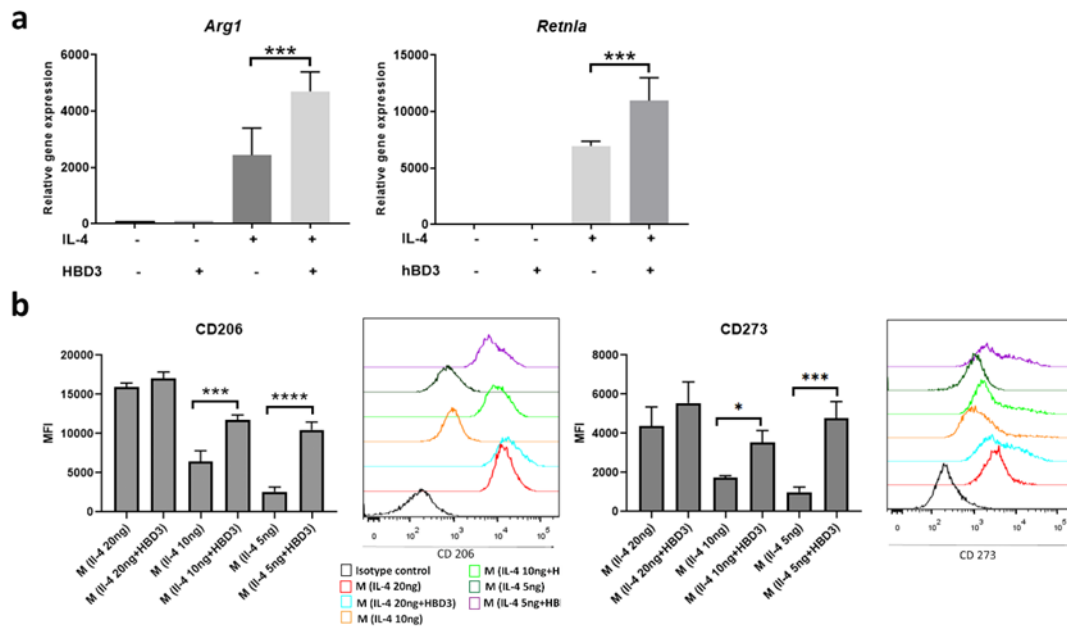

199  
200  
201

**Figure 3: The presence of HBD3 augments IL-4 polarisation.**

**a:** *Arg1*, *Retna* gene expression were measured by real time in cells polarised with and without IL-4 (20ng/ml) and with or without HBD3 as shown. Results are normalized to mRNA expression of naïve macrophages. \*\*\* p<0.001.

**b:** Representative histograms of geometric mean fluorescence intensity (MFI) of CD206 and CD273 surface markers expression analysed by flow cytometry on cells stimulated for 18hrs with IL-4 at 5 or 10ng/ml. \*\*\*\* p<0.0001, \*\*\* p<0.001, \* p<0.05. See **S3b** for dot plot scattergrams.

Comparison were done with one-way ANOVA . \*\*\*\* p<0.0001, \*\*\* p<0.001, \*\* p<0.01, \* p<0.05.

202 ***M(LPS+IFN $\gamma$ ) show promotion of OXPHOS in the presence of HBD3.***

203

204 Pro-inflammatory macrophages characteristically utilise glycolysis for rapid energy  
205 production, while oxidative phosphorylation (OXPHOS) predominates in alternatively  
206 activated macrophages at 18-24 hours (O'Neill & Pearce, 2016). It is recognised that in  
207 response to inflammatory activators, such as LPS/IFN $\gamma$ , glycolysis generates ATP,  
208 pyruvate and lactate from glucose, and the mitochondrial matrix associated tricarboxylic  
209 acid (TCA) or Krebs cycle is modified with specific breaks that allow build-up of certain  
210 intermediates and an elevation of mitochondrial membrane potential (Viola *et al*, 2019).  
211 Thus, mitochondria are repurposed from ATP production by OXPHOS, to succinate-  
212 dependent ROS generation (Mills *et al*, 2016). In contrast, alternatively activated  
213 macrophages such as M(IL-4), require the intact TCA cycle for OXPHOS, and promotion  
214 of the non-oxidative pentose phosphate pathway to satisfy the requirements for  
215 nucleotide synthesis, and N-glycosylation for alternative activation cell surface markers,  
216 such as CD206 (Jha *et al*, 2015; Wang *et al*, 2018). In agreement with this, we found  
217 naïve BMDM macrophages and those stimulated with IL-4, exhibited a high basal rate of  
218 oxygen consumption (OCR), indicative of OXPHOS, whereas LPS/IFN $\gamma$  stimulated  
219 BMDM, displayed much lower OCR indicative of reduced OXPHOS (**Fig 4 &**  
220 **Supplementary Fig. 4**). Responses to mitochondrial stress induced by various inhibitors  
221 of the electron transport chain, were determined in BMDM, under the different  
222 polarisation conditions with or without HBD3 (**Fig. 4 and supplementary Fig 4**). As  
223 expected, M(LPS/IFN $\gamma$ ) had reduced ATP respiration and maximal respiratory capacity  
224 levels compared to M(IL-4), indicating a lack of OXPHOS. The basal, ATP and maximal  
225 respiration measurements were all significantly higher in M(LPS/IFN $\gamma$ +HBD3) than those  
226 in M(LPS/IFN $\gamma$ ). HBD3 alone did not influence basal, ATP or maximal respiration of M(IL-  
227 4) and M( $\theta$ ). The lack of HBD3's effect on M( $\theta$ ) metabolism, mirrors the lack of effect  
228 HBD3 has on cytokine secretion or gene expression (**Figs 1 and 2**).

229

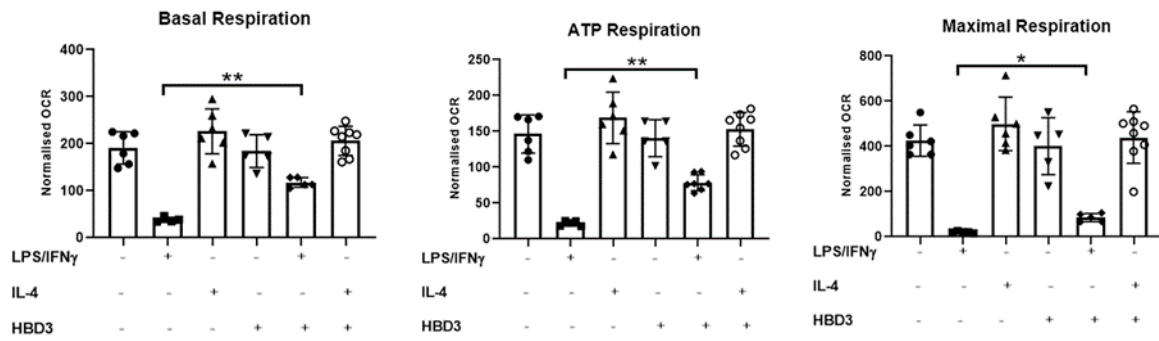

230

231

232

233

**Figure 4: Mitochondrial respiration in M(LPS/IFN $\gamma$ +HBD3).**

BMDM were polarised as labelled, with or without HBD3 for 18 hours.

Representative experiment of cellular respiration measured under mitochondrial stress condition. Calculated basal respiration, ATP production and maximal respiration measured under mitochondrial stress condition. \*\* p<0.01, \* p<0.05. Comparison were done with one-way ANOVA test. See **supplementary figure 4** for representative experimental graph.

234 Consistent with an increase in OXPHOS in M(LPS/IFN $\gamma$ +HBD3), we also detected  
235 significant reduction in gene expression of the glucose transporter *Glut1*, the rate  
236 controlling enzymes in glycolysis *Glyceraldehyde 3-phosphate dehydrogenase (Gapdh)*,  
237 and *Hexokinase 2 (Hk2)*, compared to M(LPS/IFN $\gamma$ ) (**Fig. 5a**). This partial change in  
238 cellular metabolism compared to that observed in M(LPS/IFN $\gamma$ ) reflected the partial  
239 reduction in pro-inflammatory cytokines that we observed (**Fig. 1**). Exogenous expression  
240 of *Glut1* in M(LPS) has been shown to increase glycolysis and pro-inflammatory cytokine  
241 production of TNF- $\alpha$  (Freemerman *et al*, 2014). We wished to check that the suppressive  
242 effect of HBD3 on inflammatory macrophages was not due to cell death, and staining  
243 cells with Annexin V and Propidium iodide (PI), revealed that M(LPS/IFN $\gamma$ ), M(IL4) and  
244 M( $\theta$ ) showed equivalent numbers of live cells when polarised with or without HBD3 (**Fig.**  
245 **5b**). Measurement of MTT (3-(4,5-Dimethylthiazol 2-yl)-2,5-diphenyltetrazolium bromide)  
246 absorbance however, showed decreased activity in M(LPS/IFN $\gamma$ ), compared to  
247 M(LPS/IFN $\gamma$ +HBD3) (**Fig. 5b**). The MTT absorbance values in M(IL-4), M(IL-4+HBD3)  
248 and M(LPS/IFN $\gamma$ +HBD3) were equivalent. This difference between M(LPS/IFN $\gamma$ ) and  
249 M(IL-4) has previously been described and postulated to reflect a loss of succinate  
250 dehydrogenase due to disruption of the TCA cycle in the former (Van den Bossche *et al.*,  
251 2016). Macrophages polarised with (LPS/IFN $\gamma$ )+HBD3 did not show any cell death or  
252 decrease in MTT assay activity, suggesting retention of an intact TCA cycle, and  
253 consistent with the reduced secretion of IL-1 $\beta$  in M(LPS+IFN $\gamma$ +HBD3) compared to  
254 M(LPS+IFN $\gamma$ ) (**Fig 1d**). We then looked at the activity of glyceraldehyde-3-phosphate  
255 dehydrogenase (GAPDH), a key enzyme in aerobic glycolysis, that catalyses the  
256 conversion of glyceraldehyde 3-phosphate to D-glycerate 1,3-bisphosphate in the  
257 enzymatic conversion pathway from glucose to pyruvate. Enzymatic activity of GAPDH in  
258 M(LPS/IFN $\gamma$ +HBD3) was significantly lower than in M(LPS/IFN $\gamma$ ), and equivalent in M $\theta$ ,  
259 where glycolysis is not predominant. The low level of GAPDH activity was the same as  
260 the level present when the GAPDH inhibitor dimethyl fumarate (DMF) was used in the  
261 LPS/IFN $\gamma$  polarisation (M(LPS/IFN $\gamma$ +DMF)) (**Fig 5c**). M(LPS/IFN $\gamma$ +HBD3) had similarly  
262 reduced levels of GAPDH activity as M(LPS/IFN $\gamma$ +DMF), also consistent with HBD3  
263 altering glycolytic metabolic flux. We also found a significant reduction in GAPDH activity  
264 when M(LPS/IFN $\gamma$ ) were treated with a different antimicrobial peptide, cathelicidin (also  
265 called LL-37). In addition to reduced GAPDH activity, lactate levels were decreased in  
266 M(LPS/IFN $\gamma$ +HBD3) and M(LPS/IFN $\gamma$ +LL-37) compared to M(LPS/IFN $\gamma$ ), and were  
267 equivalent to the level in M( $\theta$ ) and M(IL-4) (**Fig 5c**). Intracellular lactate levels rose in  
268 M(LPS/IFN $\gamma$ ) at this time point of 18 hours compared to naïve M( $\theta$ ) cells, a feature  
269 expected from an increase in aerobic glycolysis, as the pyruvate generated can enter  
270 mitochondria, or be reduced in the cytoplasm to lactate (Ryan *et al*, 2019; Viola *et al.*,  
271 2019). The reduction of lactate levels in M(LPS/IFN $\gamma$ +HBD3) was consistent with reduced  
272 glycolysis compared to M(LPS/IFN $\gamma$ ), and coincident with the promotion of OXPHOS,  
273 revealed by the mitochondrial stress experiments (**Fig. 4**). Taken together these results  
274 indicate that HBD3 can alter the metabolic programming of pro-inflammatory  
275 macrophages to promote OXPHOS. In the body, macrophages exist in an environment of  
276 changing polarising cytokines, and so we sought to determine the effect of HBD3 when  
277 added to already polarised macrophages.

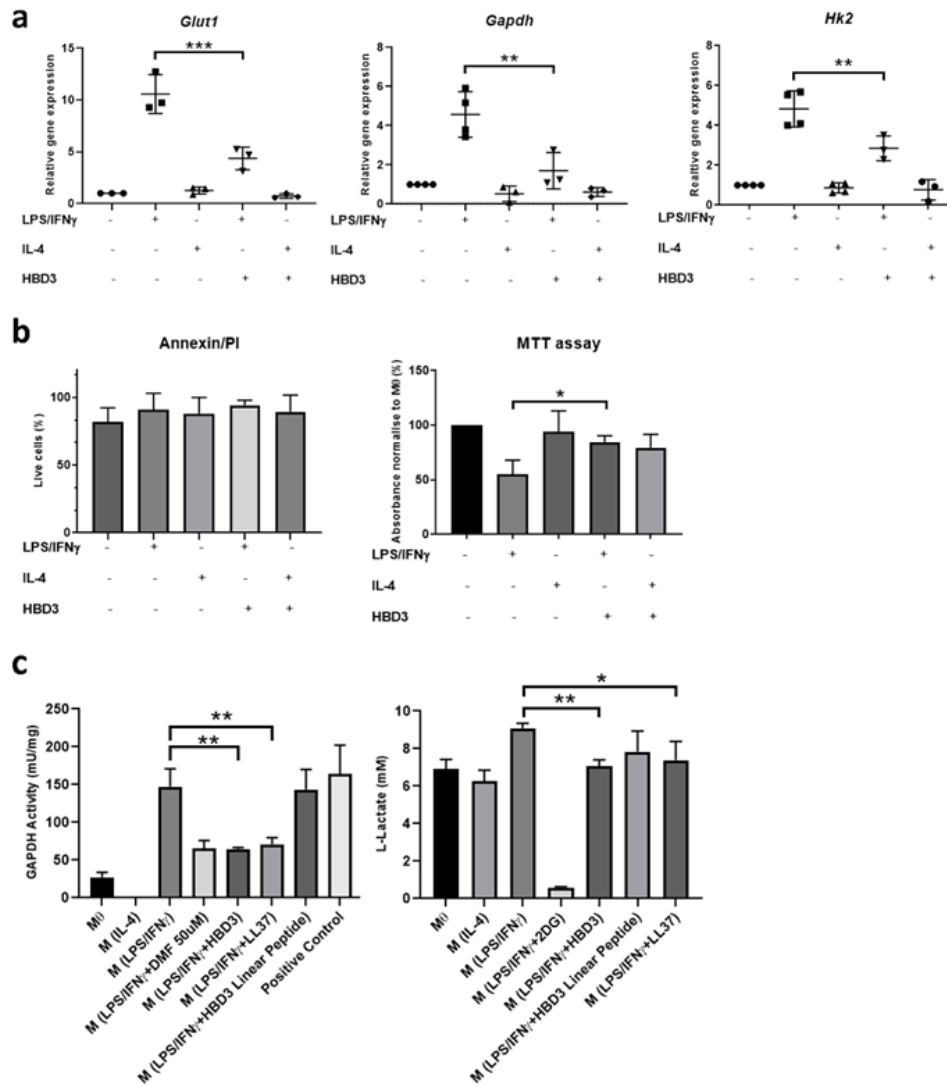

278  
279  
280

**Figure 5: M(LPS+IFN $\gamma$ )+HBD3 have lower glycolytic gene expression and GAPDH activity than M(LPS+IFN $\gamma$ ).**

**a:** *Glut1*, *Gapdh* and *Hk2* gene expression was measured by real time. Results are normalized to mRNA expression of naïve macrophages. \*\*\* p<0.001, \*\* p<0.01.

**b:** Cell viability and metabolic activity measured respectively by Annexin/PI staining and MTT assay. The value for each sample was compared to naïve macrophages. \* p<0.05.

**c:** Glycolytic GAPDH activity and L-Lactate intracellular quantification assay respectively. \*\* p<0.01, \* p<0.05.

Comparison were done with one-way ANOVA test.

281 ***M(IL-4) re-polarised with LPS+IFN $\gamma$  in the presence of HBD3, promotes OXPHOS***  
282 ***respiration.***

283  
284 BMDM treated with either LPS/IFN $\gamma$  or IL-4 for 24 hours, were re-polarised with the  
285 opposing inducer(s), with or without HBD3 for a further 18 hours (**Fig 6a**). It has been  
286 shown previously that M(LPS/IFN $\gamma$ ) protected from repolarisation by the alternative  
287 activation stimulus of IL-4, and this it has been shown that this loss of metabolic plasticity  
288 is due to irretrievable mitochondrial dysfunction by ROS generation and nitric oxide  
289 production (Van den Bossche *et al.*, 2016). In contrast, M(IL-4) can be fully re-polarised  
290 with LPS/IFN $\gamma$  to no longer use OXPHOS. Our data replicated these findings (**Fig. 6b**  
291 and **Supplementary Fig. 5a&b**) and we found that after 24 hours, the presence of HBD3  
292 did not enable IL-4 to restore OXPHOS in M(LPS/IFN $\gamma$ ) +(HBD3+IL-4) (**Fig. 6b**). M(IL-  
293 4)+(LPS/IFN $\gamma$ ) showed complete loss of OXPHOS but when HBD3 was added just  
294 before the LPS/IFN $\gamma$  re-polarisation stimulus, a significant level of oxidative  
295 phosphorylation was promoted as indicated by increased basal, ATP and maximal  
296 respiration (**Fig. 6b** and **Supplementary Fig. 6a**).



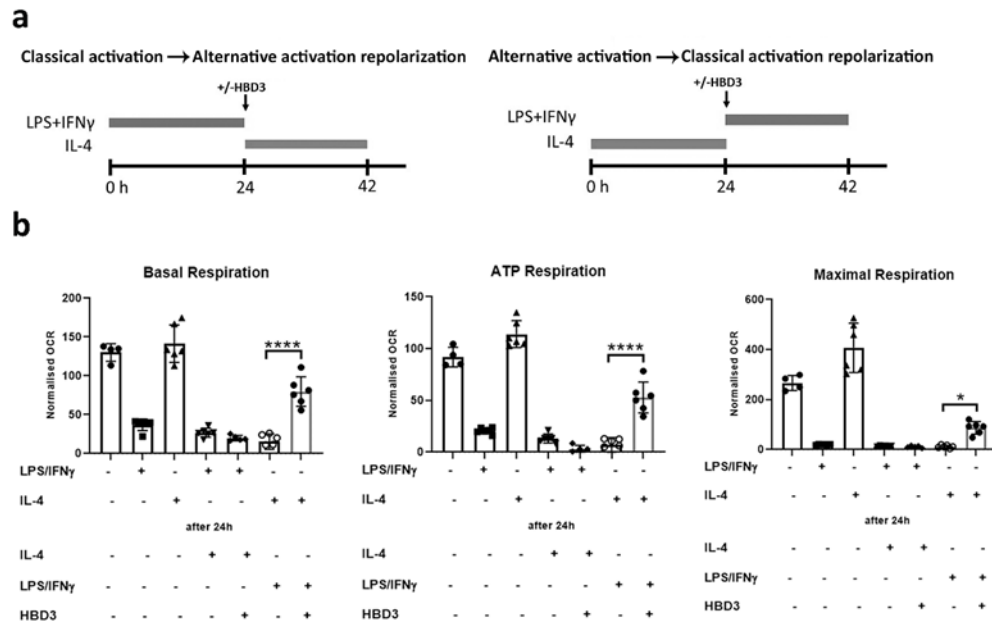

297  
298  
299

**Figure 6: The presence of OXPHOS in M(IL-4) when re-polarised with LPS+IFN $\gamma$ , requires the presence of HBD3.**

M(IL-4) or M(LPS/IFN $\gamma$ ) were treated with LPS/IFN $\gamma$  or IL-4 respectively for 24 hours, with or without HBD3 for 18 hours.

**a:** Schematic representation of re-polarisation condition. **Left Panel:** BMDMs were stimulated 24 hours with pro-inflammatory stimuli (LPS/IFN $\gamma$ ), followed +/-HBD3 for 30 minutes and then IL-4 for an additional 18 hours. **Right Panel:** BMDMs were stimulated for 24 hours with anti-inflammatory stimuli (IL-4), followed +/-HBD3 for 30 minutes then (LPS/IFN $\gamma$ ) for an additional 18 hours.

**b:** Calculated basal respiration, ATP production and maximal respiration measured under mitochondrial stress condition. \*\*\*\*  $p < 0.0001$ , \*  $p < 0.05$ . See **supplementary figure 6a** for representative experimental graph.

Comparison were done with one-way ANOVA test.

300 Consistent with the presence of OXPLOS in M(IL-4)+(HBD3+LPS/IFN $\gamma$ ), the levels of  
301 both TNF- $\alpha$  and IL-6 were reduced and *Il4* gene expression was increased compared to  
302 M(IL-4)+(LPS/IFN $\gamma$ ) (**Fig. 7a**). Furthermore, CD86 and MHCII were expressed at  
303 significantly lower levels and CD206 and CD273 at higher levels in M(IL-  
304 4)+(HBD3+LPS/IFN $\gamma$ ) (**Fig. 7b & supplementary fig. 6b**). Thus, re-polarisation of M(IL-  
305 4) with LPS/IFN $\gamma$  in the presence of HBD3, increased IL-4 production and limited pro-  
306 inflammatory activation and increased markers of alternative activation.  
307

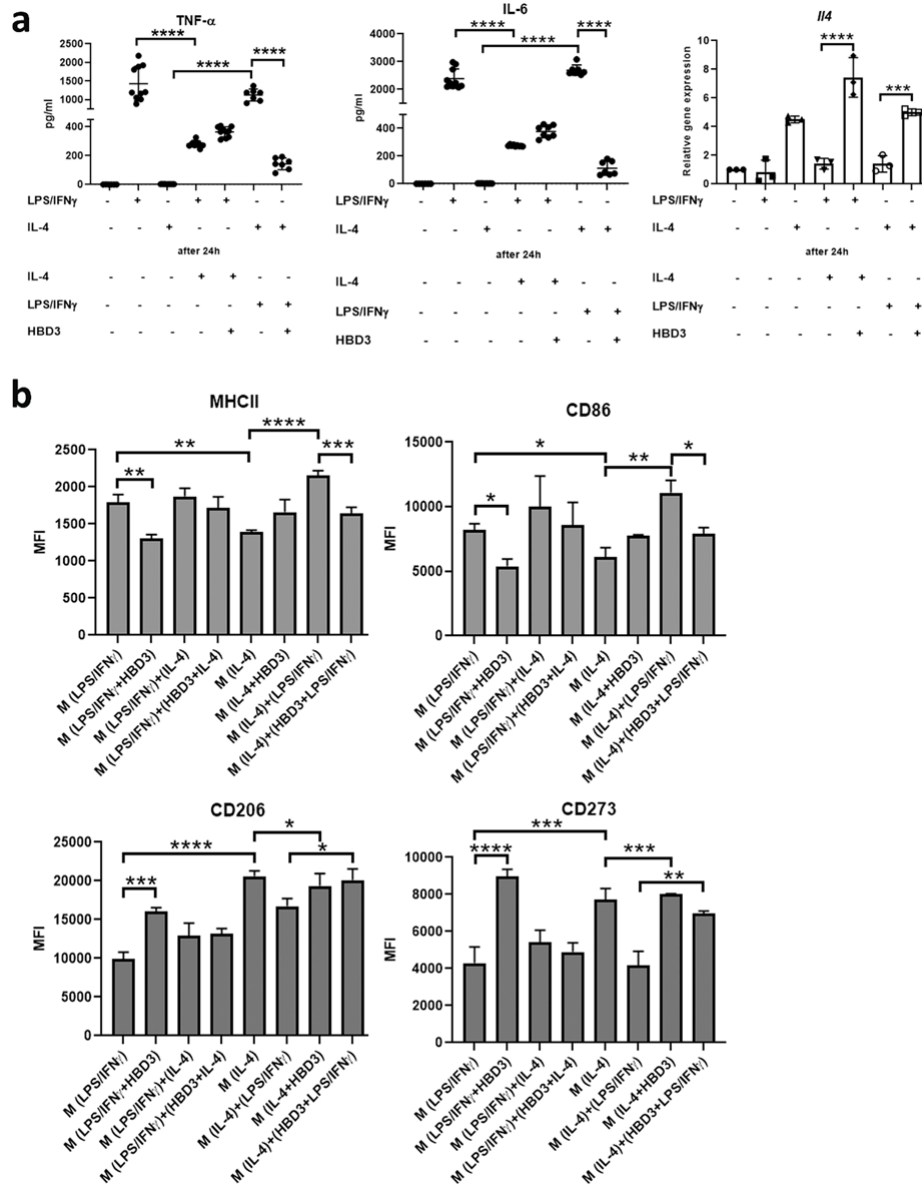

308

**Figure 7: HBD3 limits M(IL-4) re-polarisation to an inflammatory phenotype.**

M(IL-4) or M(LPS+IFN $\gamma$ ) were treated with LPS+IFN $\gamma$  or IL-4 respectively for 24 hours, with or without HBD3 for 18 hours.

**a:** TNF $\alpha$  or IL-6 level and *IL4* gene expression was measured by ELISA and real time respectively. \*\*\*\* p<0.0001, \*\*\* p<0.001.

**b:** Representative histograms of geometric mean fluorescence intensity (MFI) of MHCII, CD86, CD206 and CD273 surface markers analysed by flow cytometry. \*\*\*\* p<0.0001, \*\*\* p<0.001, \*\* p<0.01, \* p<0.05. See **Supplementary figure S6** for corresponding dot plots

310 ***HBD3 has a similar effect to IL-4 on the phenotype of MLPS/IFN $\gamma$***

311  
312 The significant increase in *Il4* expression observed when HBD3 was present in BMDM  
313 stimulation with LPS/IFN $\gamma$ , promoted us to directly compare the effect of IL-4 and HBD3  
314 on LPS/IFN $\gamma$  macrophage polarisation. Macrophages were stimulated with LPS/IFN $\gamma$  in  
315 the presence of different concentrations of IL4 (either 20 ng/ml (**Fig. 8**) or titrated doses  
316 from 0.5-20 ng/ml (**Supplementary Fig. 7**)), and compared to the effect of HBD3 with or  
317 without the cytokine. The reduction in expression levels of MHCII and CD86 observed  
318 when HBD3 was added after LPS/IFN $\gamma$ , was similar to that seen when 20ng IL-4 was  
319 substituted for HBD3, and the effect was not additive for MHCII, but was for CD86 cell  
320 surface expression (**Fig. 8a**). The increase in MFI of CD206 in M(LPS/IFN $\gamma$ +HBD3)  
321 compared to M(LPS/IFN $\gamma$ ) was also seen when IL-4 replaced HBD3, but 20ng M(IL-4)  
322 was more potent and 5 $\mu$ g/ml HBD3 had an equivalent effect to 0.5ng/ml IL-4  
323 (**Supplementary Fig. 7**). This was mirrored by CD273, but here the combination of  
324 HBD3 and IL4 was additive. The level of TNF- $\alpha$  was found to be reduced in M(LPS+IFN $\gamma$ )  
325 to the same degree by either HBD3 or IL-4, and the two together did not decrease the  
326 reduction level further. The effect on IL-6 was similar for HBD3 or 20ng/ml IL-4 when  
327 applied independently, but together the decreased response was additive (**Fig. 8b** and  
328 **Supplementary Fig. S7**).

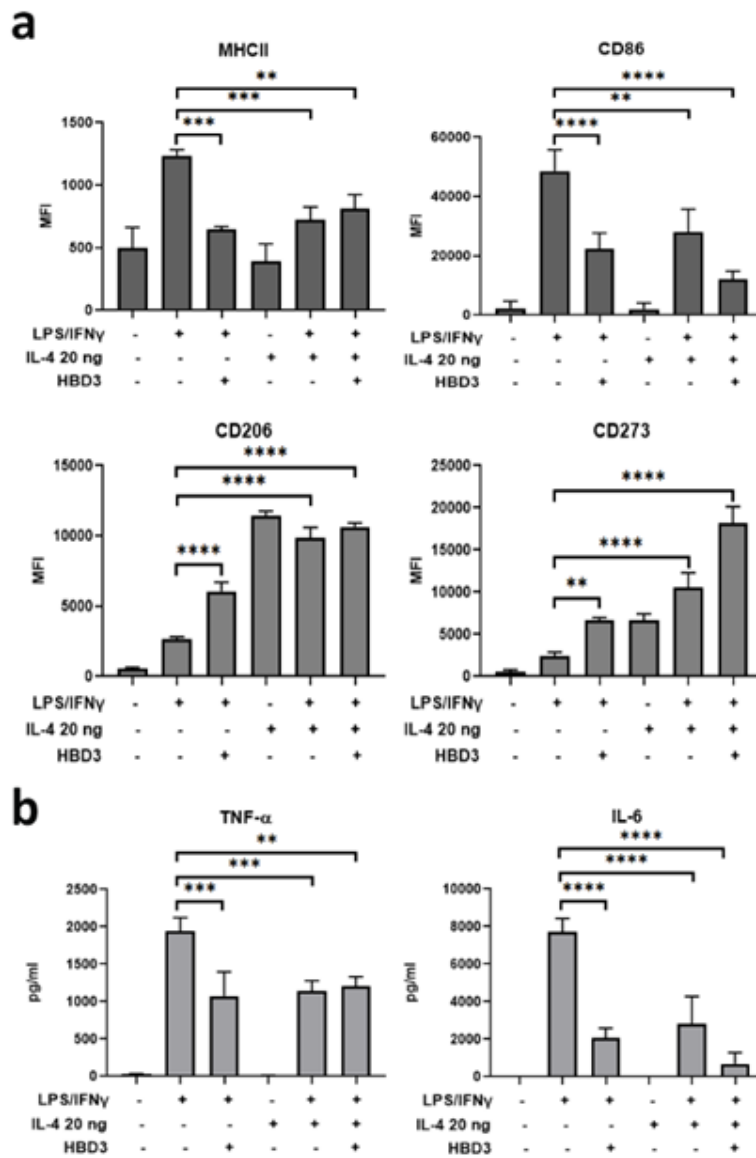

329  
330

**Figure 8: HBD3 has similar effect on M(LPS+IFN $\gamma$ ) as IL-4 .**

BMDM were polarised with (LPS+IFN $\gamma$ ) or IL-4 20 ng, with or without HBD3 for 18 hours.

**a:** Representative histograms of geometric mean fluorescence intensity (MFI) of MHCII, CD86, CD206 and CD273 surface markers analysed by flow cytometry. \*\*\*\*  $p < 0.0001$ , \*\*\*  $p < 0.001$ , \*\*  $p < 0.01$ .

**b:** TNF- $\alpha$  and IL-6 expression in supernatant measured by ELISA. \*\*\*\*  $p < 0.0001$ , \*\*\*  $p < 0.001$ , \*\*  $p < 0.01$ .

Comparison were done with one-way ANOVA test.

331 **HBD3 effect on M(LPS+IFN $\gamma$ ) polarisation is dependent on IL4-Receptor alpha**

332

333 The HBD3-mediated suppression of classical activation markers and pro-inflammatory  
334 cytokines in M(LPS+IFN $\gamma$ ), and the production of *Il4*, prompted us to determine whether  
335 IL-4 was causative using BMDM from *Il4ra* knockout mice. The expression of *Il4* in  
336 M(LPS/IFN $\gamma$ +HBD3) observed in WT mice, was lost in cells from *Il4ra*<sup>-/-</sup> mice,  
337 demonstrating that the induction of *Il4* expression is dependent on IL4-Receptor alpha  
338 (**Fig. 9a**). In addition, the ability of HBD3 to reduce the expression of MHCII and CD86,  
339 and increase CD206 and CD273 in M(LPS+IFN $\gamma$ ), was lost in cells from *Il4ra* KO (**Fig.**  
340 **9b**). *Arg1* and *Retnla* expression was also lost, as expected, in the *Il4ra* KO cells  
341 (**Supplementary Fig. 8**). TNF- $\alpha$  and IL-1 $\beta$  cytokine levels were increased by a  
342 comparable degree in both wild type and *Il4ra*<sup>-/-</sup> M(LPS/IFN $\gamma$ ), but when HBD3 was  
343 included in the polarisation, the reduction in cytokine levels seen in wild type cells, was  
344 lost in *Il4ra*<sup>-/-</sup> (**Fig. 9c**). In contrast, IL-6 levels in M(LPS/IFN $\gamma$ +HBD3) were still reduced  
345 compared to the levels detected in M(LPS/IFN $\gamma$ ), independent of *Il4ra* expression  
346 (**Supplementary Fig. 8**). These data show that the suppressive effect of HBD3 on  
347 classical activation is primarily, but not exclusively, dependent on IL-4R $\alpha$ .

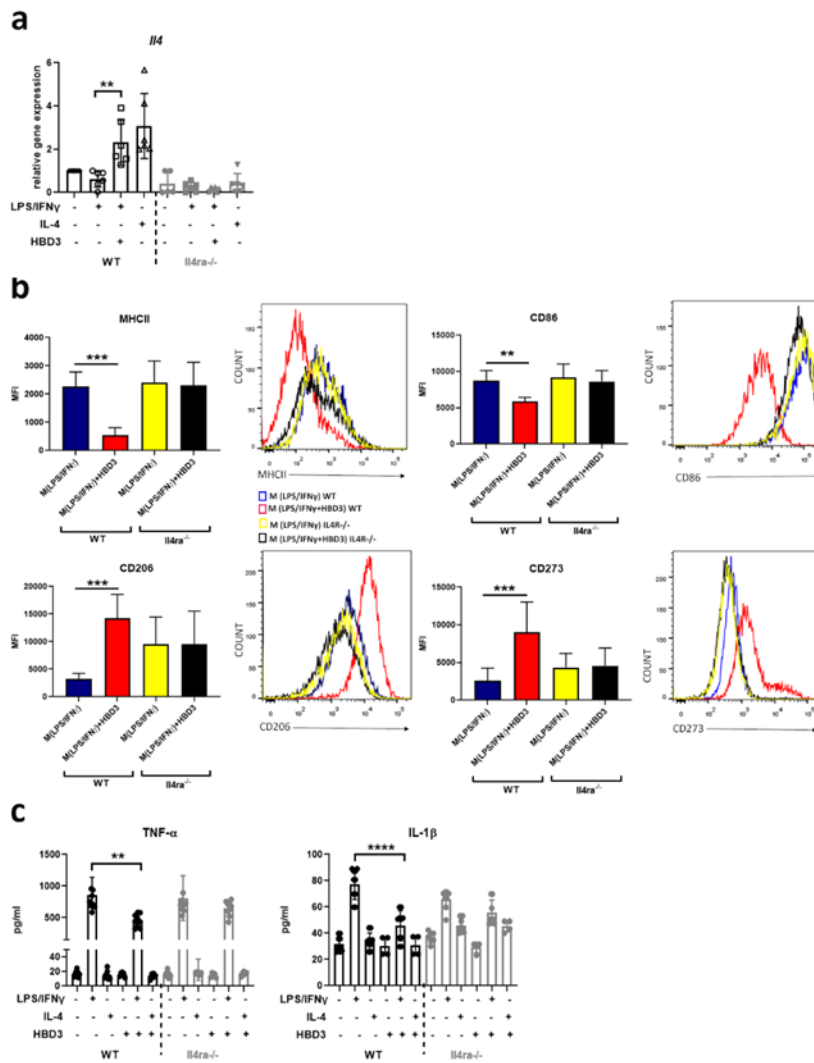

348  
349

**Figure 9: HBD3 effect on M(LPS+IFN $\gamma$ ) is dependent on IL-4R $\alpha$ .**

BMDM were polarised with (LPS+IFN $\gamma$ ) or IL-4 20 ng, with or without HBD3 for 18 hours.

**a:** *Il4* gene expression were measured by real time. Results are normalized to mRNA expression of naïve macrophages. \*\* p<0.01.

**b:** Representative histograms of geometric mean fluorescence intensity (MFI) of MHCII, CD86, CD206 and CD273 surface markers analysed by flow cytometry. \*\*\* p<0.001, \*\* p<0.01.

**c:** TNF- $\alpha$  and IL-1 $\beta$  expression in supernatant was measured by ELISA. \*\*\*\* p<0.0001, \*\* p<0.01.

Comparison were done with one-way ANOVA test.



## 350 Discussion

351 Defensins are potent antimicrobials predominantly secreted from epithelia at outward  
352 facing surfaces. However, their diverse immunomodulatory actions to increase or  
353 decrease inflammatory responses implies that they are involved in other processes *in*  
354 *vivo*. We show here a novel function for the antimicrobial peptide,  $\beta$ -defensin HBD3  
355 (DEFB14 in mouse), in suppression of the classical activation response of macrophages,  
356 and increase in alternative activation. *Defb14*<sup>tm1a</sup> mice displayed an increased  
357 inflammatory serum cytokine in the acute response to LPS. *In vitro*, polarisation with the  
358 proinflammatory cocktail (LPS/IFN $\gamma$ ) and subsequent addition of HBD3, resulted in  
359 human and mouse macrophages, that show decreased inflammatory cytokine secretion  
360 and expression of IL-4, and an increase in M(IL-4) alternative activation markers.  
361 Consistent with the decrease in classical activation and increase in alternative activation  
362 there was a change in metabolic flux, with an increase in OXPHOS and a reduction in  
363 genes key for aerobic glycolysis. Cellular metabolic re-programming is recognised as an  
364 important component in activation-induced inflammation or homeostasis (Murphy, 2019;  
365 Viola *et al.*, 2019).

366  
367 The functional switch of macrophages to a pro-inflammatory, protective but potentially  
368 host-damaging phenotype, is self-limited through a variety of mechanisms that include  
369 lactylation (Zhang *et al.*, 2019), production of anti-inflammatory molecules such as IL-10  
370 (Ip *et al.*, 2017), and itaconate -which relies on a break in TCA cycle (Lampropoulou *et al.*,  
371 2016). Lactate increases during glycolysis and has been shown to mediate lactylation of  
372 histone lysines (Kla) in promoter regions of core genes, 16 to 24 hours after M1  
373 activation (Zhang *et al.*, 2019). Lactate supplementation can increase histone Kla levels,  
374 and induces *Arg1* expression through Kla of the *Arg1* promoter. It is unlikely that  
375 lactylation is relevant here as consistent with a reduced glycolytic flux in M(LPS/IFN $\gamma$ ) in  
376 the presence of HBD3, lactate levels decreased indicating no promotion of lactylation by  
377 the presence of HBD3 at 18 hours, despite increased markers of M(IL-4) alternative  
378 activation. In addition, we show here that HBD3 enhances the IL-4 mediated polarisation  
379 of macrophages, a process which does not involve lactylation (Zhang *et al.*, 2019).

380  
381 A shift in metabolic flux that promotes OXPHOS has been shown to be mediated by IL-10  
382 in macrophages exposed to LPS, with inhibition of glucose uptake and glycolysis (Ip *et*  
383 *al.*, 2017). We did see that M(LPS/IFN $\gamma$ +HBD3) had a high IL-10 level at 18 hours and  
384 increased OXPHOS, but the IL-10 level was less than that evident in M(LPS/IFN $\gamma$ ). Thus,  
385 IL-10 is likely not central to the ability of HBD3 to increase OXPHOS.

386  
387 Activated macrophages and lymphoid cells, can be succinated by DMF to inactivate the  
388 catalytic cysteine of GAPDH, to reduce glycolytic flux both *in vitro* and *in vivo* (Kornberg  
389 *et al.*, 2018). A similar reduction in GAPDH activity in M(LPS/IFN $\gamma$ ) was seen here when  
390 we substituted 5 $\mu$ M HBD3 for 50 $\mu$ M DMF. The antimicrobial peptide cathelicidin, can also  
391 reduce LPS-induced cytokine response in macrophages (Hancock *et al.*, 2016; Sun *et al.*,  
392 2015). Although cathelicidin has a simple linear alpha helical structure, unlike the  
393 conserved cysteine knot structure of defensins, in common with HBD3 it is amphipathic  
394 and cationic, and can rapidly enter macrophages. LL-37 has been shown to associate  
395 with GAPDH in macrophages (Mookherjee *et al.*, 2009). It is possible that HBD3 binds  
396 GAPDH to inhibit its activity and limit expression of key enzymes of glycolysis, and  
397 reduce production of lactate. A consequence of this would be that glycolysis would stall  
398 at glyceraldehyde 3 phosphate, but the pentose pathway would remain intact, allowing N-  
399 glycosylation, essential for CD206 cell surface expression, which was significantly

400 increased by HBD3. LPS induction of IL-1 $\beta$  (but not TNF- $\alpha$ ) has been shown to be  
401 dependent on succinate accumulation during glycolysis (Tannahill *et al*, 2013). HBD3  
402 reduces both these cytokines and so does DMF (Ali *et al*, 2020).  
403 In addition to reduction in the macrophage polarisation response to LPS/IFN $\gamma$ , we also  
404 show here that, mouse BMDM, polarised with sub-saturation levels of IL-4, show an  
405 augmented alternative activation when in the presence of HBD3. When HBD3 is present  
406 during the LPS/IFN $\gamma$  polarisation, IL-4 gene expression is induced in BMDM, RAW 264.7  
407 cells and cytokine is found in PBMDM. IL-4 and HBD3 had a similar effect on the  
408 phenotype of cells exposed to LPS/IFN $\gamma$  and the effect on IL-6 secretion was additive  
409 even at high concentration of IL-4. Macrophages activated by IL-4, can induce  
410 transcriptional suppression of a subset of genes that results in reduced responsiveness  
411 to LPS by a subset of pro-inflammatory genes including IL-1 $\beta$  (Czimmerer *et al.*, 2018). It is  
412 likely therefore that HBD3 driving IL-4 production is key in the effects of the peptide on  
413 polarisation. Several publications have previously reported IL-4 production by  
414 macrophages under certain conditions. The autocrine production of IL-4 by macrophages  
415 in response to TLR activation was found at 24-48 hours (Mukherjee *et al*, 2009; Shirey *et*  
416 *al*, 2010). In addition, IFN $\gamma$  primed BMDM exposed to LPS in combination with immune  
417 complexes that ligate Fc $\gamma$ R $\alpha$ s, have also been shown to potently induce production of IL-4  
418 cytokine (La Flamme *et al*, 2012).  
419 The ability of HBD3 to decrease the expression of classical activation markers and  
420 cytokines TNF- $\alpha$  and IL-1 $\beta$  and increase alternative activation markers in M(LPS/IFN $\gamma$ )  
421 was dependent on IL-4R $\alpha$ . This again indicates the significance of the observed increase  
422 in IL-4 in the presence of classical stimulation and HBD3. HBD3 mediated reduction of  
423 IL-6 secretion however, was not dependent on IL-4R $\alpha$ . Thus HBD3 must act through IL-  
424 4R $\alpha$  dependent and independent mechanisms.  
425 It is important to consider whether the immunomodulatory effect of HBD3 is likely to be  
426 relevant *in vivo*. The inability of HBD3 to promote OXPHOS in cells, already polarised for  
427 24 hours with LPS/IFN $\gamma$ , is similar to the findings using IL-4 *in vitro* and also *in vivo* (Van  
428 den Bossche *et al.*, 2016). Ruckerl *et al.* demonstrate macrophage plasticity is present *in*  
429 *vivo*, and the type II activation phenotype established due to an initial nematode infection,  
430 can be altered upon subsequent infection with *Salmonella* (Ruckerl *et al*, 2017). In  
431 keeping with *in vitro* results, there was no evidence that the *Salmonella* activation can be  
432 altered by subsequent *nematode* challenge. However DMF, as discussed above, is an  
433 effective treatment for multiple sclerosis and psoriasis as an immunomodulatory  
434 compound, and DMF alters the metabolic flux in macrophages and lymphocytes to  
435 reduce glycolysis and influence survival of Th1 and Th17 cells (Kornberg *et al.*, 2018).  
436 The fact that HBD3 reduced production of damaging inflammatory cytokines (including  
437 IL-12 which influences both innate and adaptive responses) is encouraging that a change  
438 in myeloid metabolism from glycolytic to OXPHOS may be relevant *in vivo* if given rapidly  
439 or chronically. DEFB14 and HBD3 peptides have been shown to induce polarisation of  
440 CD4 $^{+}$  T helper cells to *Foxp3* expressing CD4 $^{+}$  T cells, and can rescue mice from  
441 experimental acute encephalitis, a model of multiple sclerosis (Bruhs *et al*, 2016; Navid *et*  
442 *al*, 2012).  
443  
444 Several other lines of evidence support HBD3/DEFB14 being important in resolution and  
445 restoration of homeostasis. In addition to the *Defb14*<sup>tm1a</sup> response to LPS, we describe  
446 here, *Defb14* gene targeted mice show a global delay in wound healing *in vivo* (Williams  
447 *et al*, 2018). In addition, DEFB14 production from mouse pancreatic endocrine cells,  
448 stimulates IL-4 secreting B cells through TLR2 to increase alternate activation of  
449 macrophages, allowing tolerance and prevention of autoimmune diabetes (Miani *et al*,

450 2018). Finally, Tewary et al. report that splenocytes from mice, immunised with OVA+/-  
451 HBD3, and isolated a week after a final boost, show an increase in the type 2 cytokine IL-  
452 5 when HBD3 was present (Tewary *et al.*, 2013). HBD3 is, however, a double edged  
453 sword and can act both as an alarmin and a suppressor of inflammation. Indeed Tewary  
454 et al. also report OVA+CpG+HBD3 immunisation induces cells expressing IFN $\gamma$ . The  
455 difference in effects is likely due to the prevailing environment and the concentration of  
456 the peptide. HBD3 is one of the seven copy number variable  $\beta$ -defensins, and increased  
457 copy number and expression level associates with the inflammatory Th1/Th17  
458 autoimmune disease psoriasis (Abu *et al.*, 2009). The levels of HBD3 observed in the skin  
459 are The anti-inflammatory effect we describe here is somewhat of a paradox to this  
460 association, but a “goldilocks” effect may exist where too little or too much is not the right  
461 amount. Our titration of HBD3 showed lower levels of peptide suppress TNF- $\alpha$  production  
462 but this is diminished at high peptide levels that are known to be toxic (Leelakanok *et al.*,  
463 2015). Expression of  $\beta$ -defensins is normally low, around 0.2ng/ml in normal serum but  
464 inflammation can dramatically increase expression by up to 1000 fold in the serum of  
465 patients with the inflammatory condition psoriasis and even higher in the skin (Jansen *et*  
466 *al.*, 2009).

467  
468 In conclusion, we show here that HBD3 strongly influences macrophage polarisation  
469 through an IL-4R $\alpha$  dependent mechanism. The data indicate that HBD3 drives IL-4  
470 production under inflammatory conditions resulting in a limit on classical activation and  
471 pro-inflammatory responses *in vitro* and *in vivo* and coincident with augmentation of  
472 macrophage alternative activation. HBD3 is rapidly induced by exposure to pathogen  
473 molecular patterns or inflammatory cytokines and secreted from epithelial cells where it  
474 can act as a potent antimicrobial, but once the danger is reduced, its immunomodulatory  
475 properties may be a key part of the resolution process. Further work is required to  
476 investigate the *in vivo* ability of HBD3 or derivatives to control both innate and adaptive  
477 immune phenotypes and ascertain their potential for clinical and therapeutic benefit.

478  
479

## 480 **Methods**

### 481 ***In vivo experiments***

482 ES cell *Defb14<sup>tm1a(HGU1)</sup>* gene targeted mice were generated as detailed previously  
483 (Reijns *et al*, 2012) using a KOMP vector and further information is provided in  
484 supplementary figure 1. Animal studies were covered by a Project License, granted by  
485 the UK Home Office under the Animal Scientific Procedures Act 1986, and locally  
486 approved by the University of Edinburgh Ethical Review Committee. Chimaeric mice  
487 were backcrossed to 8 generations on C57Bl/6J. Mice were injected intraperitoneally (IP)  
488 into male mice (8-12 weeks old) as previously described with 15mg/Kg LPS +/- 10µg  
489 HBD3 peptide(Semple *et al.*, 2010).

490 ***Isolation, differentiation and polarisation of Macrophages.*** Mouse bone marrow cells  
491 were collected from the femurs and tibia of 6-10 weeks old C57BL/6 mice. After washing  
492 in DPBS (GIBCO™, #14040-091), cells were cultured at 2x10<sup>6</sup> cells/plate in DMEM/F12  
493 GlutaMAX™ (GIBCO™, #31331-028) medium supplemented with 10% FBS (GIBCO™,  
494 #10500-064), 1% L-Glutamine (200 nM) (GIBCO™, #25030-024), 1% Penicillin-  
495 Streptomycin (10,000 U/mL) (GIBCO™, #15140-122) and 20% of L929-conditioned  
496 media, for 7 days. L929 conditioned media was made as previously reported  
497 (Weischenfeldt and Porse, 2008).5x10<sup>5</sup> L929 cells were seeded in a T75 flask in 25ml of  
498 DMEM/F12 GlutaMAX™ medium supplemented with 10% FBS, 1% L-Glutamine, 1%  
499 Pen-Strep. Cells were cultured for 7/8 days and the culture supernatant was collected,  
500 centrifuged for 5 minutes at 1200 rpm and then stored at 80°C. The cells were  
501 maintained in a humidified incubator with 95% air and 5% CO<sub>2</sub> atmosphere at 37°C. The  
502 media was replaced every 2-3 days during the culture. After differentiation all the medium  
503 was removed, and naïve macrophages were stimulated to a classical, PRO-inflammatory  
504 phenotype (M(LPS+IFNγ) by overnight incubation with LPS (50 ng/ml) .

505 Peripheral blood mononuclear cells were isolated by Percoll gradient from whole blood  
506 donated by healthy volunteers with written informed consent (AMREC 20-HV-069). Cells  
507 were plated at 2 x10<sup>6</sup> in 24-well tissue culture plates and cultured in RPMI + 10% FCS  
508 (low endotoxin), and matured to monocyte derived macrophages (MDMs) over 14 days,  
509 with media changes every 3 – 4 days. MDMs were then treated for polarisation as  
510 described in the text. Following treatment, cell supernatant was harvested for ELISA.  
511 (Lipopolysaccharides from Escherichia coli O111:B4, ultrapure, Source Bio Science,  
512 #AV-7016-1) and recombinant murine IFNγ (20 ng/m(PEPROTECH, #315-05)) or  
513 towards an alternative activation phenotype (M(IL-4)) by overnight incubation with  
514 recombinant murine IL-4 (20 ng/ml or other dilution as described in results  
515 (PEPROTECH, #214-14) .

516 Treatments with HBD3 peptide(s) was after 15-30 minutes 5 µg/ml of human β-Defensin-  
517 3 (hBD3) (Peptide Institute Inc., PeptaNova GmbH #4382-s), or 5 µg/ml of Linear  
518 Defensin (Almac Sciences Scotland Ltd, UK) or 5 µg/ml of LL37 (Almac Sciences  
519 Scotland Ltd, UK). After 18 hours, medium and cells were harvested. For GAPDDH  
520 activity assay, cells were treated with Dimethyl fumarate (DMF) 50 µM (Sigma, #242926)  
521 and for Glycolysis Cell-Based assay, cells were treated with 2-deoxyglucose (2-DG) 100  
522 nM (Sigma, #D8375).

### 523 ***Flow cytometry analysis***



524 Cells were cultured and treated as previously described. After washing, they were  
525 incubated with blocking solution (0.5% BSA, 1% FBS) for 10 minutes at room  
526 temperature. Then cells were incubated with: F4/80 (BioLegend, #123113), CD11b  
527 (BioLegend, #101261), MHCII (BioLegend, #107643), CD86 (BioLegend, #105041),  
528 CD206 (BioLegend, #141707), CD273 (BioLegend, #107205) antibodies for 30 minutes  
529 on ice. Samples were analysed on Flow Analyser QFCF 5L LSR FORTESSA (BD  
530 Biosciences), followed by data analysis using FlowJo (version X) flow cytometry analysis  
531 software (FlowJo, LLC). Isotype control antibodies used at the same concentration did  
532 not give any detectable signal. Data are representative of three independent  
533 experiments.

534 **RNA extraction and qRT-PCR** Total RNA from BMDMs was extracted with TRIzol™  
535 Reagent (ThermoFisher Scientific, #15596026), followed by phenol:chloroform extraction  
536 with an overnight isopropanol precipitation. RNA samples were treated with 1 µl DNase I  
537 (2 U) (Ambion™, #AM2222) per 10 µg of total RNA in a 50 µl reaction for 30 minutes at  
538 37°C, and then precipitated in 70% isopropanol with sodium acetate 150 mM. RNA  
539 concentration was determined by NanoDrop 1000 Spectrophotometer  
540 (ThermoScientific). 1 µg of total RNA was reverse transcribed into cDNA with M-MLV  
541 Reverse Transcriptase 200 units (Promega, #M1701), Random Primer 0.5 µg (Promega,  
542 #C1181), dNTP Mix 200 µM (Promega, #U1511), RNasin® Ribonuclease Inhibitors 25  
543 units (Promega, #N2511). Samples were incubated for 1 hour at 37°C. The cDNA  
544 generated was used for semi quantitative PCR on a StepOne plus RT PCR 96 well cycler  
545 (Applied Biosystem) according to the manufacturer's instructions using Fast SYBR™  
546 Green Master Mix (ThermoFisher, #4385616). Each PCR series included a no-template  
547 control that contained water instead of cDNA and a reverse transcriptase-negative  
548 control. Data was analysed on StepOne™ Software v2.3 (Applied Biosystem) and target  
549 gene expression was normalized to the expression of the housekeeping gene ACTIN  
550 BETA. Relative gene expression was calculated using the standard 2-ΔΔCT method.  
551 Primers were designed using PrimerQuest Tool (IDT Integrated DNA Technologies).  
552 Samples were analysed in technical triplicates and biological triplicates.

553 **ELISA** Levels of TNF-α, IL-6, IL-1β, IL-10, IL-4 in cell culture supernatants or peritoneal  
554 washes were determined using DuoSet ELISA Development kits (R&D Systems)  
555 according to the manufacturer's instructions. Samples were analysed in technical  
556 duplicates and biological triplicates, each standard in technical duplicate.

#### 557 **Measurement of Oxygen Consumption Rate (OCR)**

558 The OCR was measured using a Seahorse XFe24 Analyzer (Seahorse Biosciences,  
559 Billerica, MA, USA). BMDMs were seeded in XF24 cell culture microplates (24 wells) at a  
560 density of  $2 \times 10^5$  cells/well and incubate overnight. After treatment as described before,  
561 assay medium consistent of Seahorse XF Assay medium (Agilent, Seahorse Biosciences,  
562 #102365-100) supplemented with Glucose 10 mM (Sigma, #G8270), Sodium pyruvate 2  
563 mM (Sigma, #P5280) and adjusted to pH 7.4, was added to the cells. The inhibitors and  
564 uncouplers used in this study were as follows: Oligomycin A 2µM (Sigma, #75351),  
565 FCCP 75 µM (Cambridge Bioscience, #15218), Rotenone 1 µM (Sigma, #R8875) and  
566 Antimycin A 2.5 µM (Sigma, #A8674). OCR was normalised to cell number by SRB  
567 staining. Each sample was assayed in 6 technical replicates, and 2 biological replicates.

#### 568 **Sulforhodamine B (SRB) staining**

569 Cells seeded in a 24 well plate in presence of medium, were fixed with 50% TCA solution  
570 (Sigma, Trichloroacetic acid #T9159) at the final concentration of 10%, and incubate at  
571 4°C for 1 hour. After wash in tap water and air-dried, TCA-fixed cells were stained by  
572 adding 50 µl of SRB solution 0.4% in 1% glacial acetic acid (Sigma, SRB #S1402) for 30  
573 minutes at room temperature. The excess dye was removed with 10 washes with 2%  
574 glacial acetic acid (Fisher Chemical, #A38S-500). The plate was air-dried and the cell-  
575 bound dye re-dissolved by 100 µl of Tris solution 10 mM pH 10.5 (Sigma, Trizma  
576 #T6066). The OD was measured at 540-490 nm with a microplate reader (SYNERGY™  
577 HT, BIOTEK® Instrument Inc., Vermont USA).

#### 578 **GAPDH assay**

579 Glyceraldehyde 3 Phosphate Dehydrogenase Activity was measured by using  
580 Glyceraldehyde 3 Phosphate Dehydrogenase Activity Assay kit (Colorimetric) (Abcam®,  
581 #ab204732) according to the manufacturer's instructions. Briefly, cells were cultured in 6  
582 wells plate and treated at different condition. DMF was added as a negative control. After  
583 lysis, the supernatant was collect and added to 50 µl of Reaction mix. The OD of  
584 standards, samples and positive control was measured at 450 nm, in a microplate reader  
585 in a kinetic mode, every 2 minutes, for 10 minutes. Data were analysed as the kit's  
586 manual suggested. Each sample was assayed in technical triplicate and biological  
587 triplicates, and each standard in technical duplicate.

#### 588 **Lactate assay**

589 Glycolysis Cell-Base Assay kit (Cayman Chemical, #600450) was a colorimetric method  
590 to detect L-lactate amount in the medium. According to the manufacturer's instructions,  
591 cells seeded in a 96 wells plate, were treated and grown one overnight in absence of  
592 serum. As negative control cells were treated with 2-2DG. 10 µl of medium for each  
593 sample and 10 µl of each standard were added to reaction solution and incubated for 30  
594 minutes in an orbital shaker at room temperature. The absorbance was measured at 490  
595 nm in a microplate reader. Data were analysed as the kit's manual suggested. Each  
596 sample was assayed in technical triplicate and biological triplicates, and each standard in  
597 technical duplicate.

#### 598 **MTT assay**

599 Succinate dehydrogenase activity was measured by MTT assay (Sigma, #M2128).  
600 Briefly, BMDMs were seeded in a 96 well plate and incubated with 100 µl of MTT 5mg/ml  
601 at 37°C. After 3 hours the media was removed and acidic isopropanol (0.1 N HCl) was  
602 added for 30 minutes. The succinate dehydrogenase activity was assessed by yellow  
603 MTT reduction into purple formazan and the absorbance was measured at 580 nm in a  
604 microplate reader. Each sample was compared to the level of naïve macrophages, and  
605 was analysed in technical triplicates and biological triplicates.

#### 606 **Cell viability**

607 Cell viability was tested by using the APC Annexin V Apoptosis Detection Kit (BioLegend,  
608 #640932). Cells were washed twice with cold BioLegend Cell Staining Buffer, and then  
609 re-suspended in Annexin V Binding Buffer at a concentration of 0.25-1.0 x 10<sup>7</sup> cells/ml.  
610 Cells were stained with 5 µl of APC Annexin V and 10 µl of Propidium Iodide Solution for  
611 15 min at room temperature in the dark. The samples was analysed by flow cytometry.

#### 612 **Re-polarisation**

613 Cells was treated with LPS/IFN $\gamma$  or IL-4 and after 20/24 hours washed in PBS, and then  
614 treated with medium. After 30 minutes, polarisation factors were added as indicated. For  
615 HBD3 treatment, HBD3 was added 30 minutes before the re-polarisation factors.

616 ***Statistical analysis***

617 Statistical analyses were performed using GraphPad Prism 8.1.2 (GraphPad Software  
618 Inc., San Diego). Comparison were done with one-way ANOVA test, \* p<0.05, \*\* p<0.01,  
619 \*\*\* p<0.001, \*\*\*\* p<0.0001. Statistical values can be found in the figure legends.

620

621

622



## 623 References

624

625

626 Abu BS, Hollox EJ, Armour JA (2009) Allelic recombination between distinct genomic locations  
627 generates copy number diversity in human beta-defensins. *Proc Natl Acad Sci USA* 106: 853-858

628 Ali M, Bonay M, Vanhee V, Vinit S, Deramaudt TB (2020) Comparative effectiveness of 4 natural and  
629 chemical activators of Nrf2 on inflammation, oxidative stress, macrophage polarization, and  
630 bactericidal activity in an in vitro macrophage infection model. *PLoS One* 15: e0234484

631 Bauer F, Schweimer K, Kluver E, Conejo-Garcia JR, Forssmann WG, Rosch P, Adermann K, Sticht H  
632 (2001) Structure determination of human and murine beta-defensins reveals structural conservation  
633 in the absence of significant sequence similarity. *Protein Sci* 10: 2470-2479

634 Bruhs A, Schwarz T, Schwarz A (2016) Prevention and Mitigation of Experimental Autoimmune  
635 Encephalomyelitis by Murine  $\beta$ -Defensins via Induction of Regulatory T Cells. *J Invest Dermatol* 136:  
636 173-181

637 Czimmerer Z, Daniel B, Horvath A, Ruckerl D, Nagy G, Kiss M, Peloquin M, Budai MM, Cuaranta-  
638 Monroy I, Simandi Z *et al* (2018) The Transcription Factor STAT6 Mediates Direct Repression of  
639 Inflammatory Enhancers and Limits Activation of Alternatively Polarized Macrophages. *Immunity* 48:  
640 75-90.e76

641 Duits LA, Ravensbergen B, Rademaker M, Hiemstra PS, Nibbering PH (2002) Expression of beta-  
642 defensin 1 and 2 mRNA by human monocytes, macrophages and dendritic cells. *Immunology* 106:  
643 517-525

644 Edfeldt K, Liu PT, Chun R, Fabri M, Schenk M, Wheelwright M, Keegan C, Krutzik SR, Adams JS,  
645 Hewison M *et al* (2010) T-cell cytokines differentially control human monocyte antimicrobial  
646 responses by regulating vitamin D metabolism 1. *Proc Natl Acad Sci USA* 107: 22593-22598

647 Freerman AJ, Johnson AR, Sacks GN, Milner JJ, Kirk EL, Troester MA, Macintyre AN, Goraksha-  
648 Hicks P, Rathmell JC, Makowski L (2014) Metabolic reprogramming of macrophages: glucose  
649 transporter 1 (GLUT1)-mediated glucose metabolism drives a proinflammatory phenotype. *J Biol*  
650 *Chem* 289: 7884-7896

651 Gundra UM, Girgis NM, Ruckerl D, Jenkins S, Ward LN, Kurtz ZD, Wiens KE, Tang MS, Basu-Roy U,  
652 Mansukhani A *et al* (2014) Alternatively activated macrophages derived from monocytes and tissue  
653 macrophages are phenotypically and functionally distinct. *Blood* 123: e110-122

654 Hancock RE, Haney EF, Gill EE (2016) The immunology of host defence peptides: beyond  
655 antimicrobial activity. *Nat Rev Immunol* 16: 321-334

656 Huber S, Hoffmann R, Muskens F, Voehringer D (2010) Alternatively activated macrophages inhibit T-  
657 cell proliferation by Stat6-dependent expression of PD-L2. *Blood* 116: 3311-3320

658 Ip WKE, Hoshi N, Shouval DS, Snapper S, Medzhitov R (2017) Anti-inflammatory effect of IL-10  
659 mediated by metabolic reprogramming of macrophages. *Science* 356: 513-519

660 Jansen PA, Rodijk-Olthuis D, Hollox EJ, Kamsteeg M, Tjabringa GS, de Jongh GJ, van Vlijmen-Willems  
661 IM, Bergboer JG, van Rossum MM, de Jong EM *et al* (2009) Beta-defensin-2 protein is a serum  
662 biomarker for disease activity in psoriasis and reaches biologically relevant concentrations in lesional  
663 skin 1. *PLoS One* 4: e4725

664 Jha AK, Huang SC, Sergushichev A, Lampropoulou V, Ivanova Y, Loginicheva E, Chmielewski K,  
665 Stewart KM, Ashall J, Everts B *et al* (2015) Network integration of parallel metabolic and  
666 transcriptional data reveals metabolic modules that regulate macrophage polarization. *Immunity* 42:  
667 419-430

668 Kornberg MD, Bhargava P, Kim PM, Putluri V, Snowman AM, Putluri N, Calabresi PA, Snyder SH  
669 (2018) Dimethyl fumarate targets GAPDH and aerobic glycolysis to modulate immunity. *Science* 360:  
670 449-453

671 La Flamme AC, Kharkrang M, Stone S, Mirmoeini S, Chuluundorj D, Kyle R (2012) Type II-activated  
672 murine macrophages produce IL-4. *PLoS One* 7: e46989

673 Lampropoulou V, Sergushichev A, Bambouskova M, Nair S, Vincent EE, Loginicheva E, Cervantes-  
674 Barragan L, Ma X, Huang SC, Griss T *et al* (2016) Itaconate Links Inhibition of Succinate  
675 Dehydrogenase with Macrophage Metabolic Remodeling and Regulation of Inflammation. *Cell*  
676 *Metab* 24: 158-166  
677 Lande R, Chamilos G, Ganguly D, Demaria O, Frasca L, Durr S, Conrad C, Schröder J, Gilliet M (2015)  
678 Cationic antimicrobial peptides in psoriatic skin cooperate to break innate tolerance to self-DNA. *Eur*  
679 *J Immunol* 45: 203-213  
680 Latty SL, Sakai J, Hopkins L, Verstak B, Paramo T, Berglund NA, Cammarota E, Cicuta P, Gay NJ, Bond  
681 PJ *et al* (2018) Activation of Toll-like receptors nucleates assembly of the MyDDosome signaling hub.  
682 *Elife* 7  
683 Lee EY, Lee MW, Wong GCL (2019) Modulation of toll-like receptor signaling by antimicrobial  
684 peptides. *Semin Cell Dev Biol* 88: 173-184  
685 Leelakanok N, Fischer CL, Bates AM, Guthmiller JM, Johnson GK, Salem AK, Brogden KA, Brogden NK  
686 (2015) Cytotoxicity of HBD3 for dendritic cells, normal human epidermal keratinocytes, hTERT  
687 keratinocytes, and primary oral gingival epithelial keratinocytes in cell culture conditions. *Toxicol Lett*  
688 239: 90-96  
689 McGlasson SL, Semple F, MacPherson H, Gray M, Davidson DJ, Dorin JR (2017) Human  $\beta$ -defensin 3  
690 increases the TLR9-dependent response to bacterial DNA. *Eur J Immunol* 47: 658-664  
691 Miani M, Le Naour J, Waeckel-Enée E, Verma SC, Straube M, Emond P, Ryffel B, van Endert P, Sokol  
692 H, Diana J (2018) Gut Microbiota-Stimulated Innate Lymphoid Cells Support  $\beta$ -Defensin 14  
693 Expression in Pancreatic Endocrine Cells, Preventing Autoimmune Diabetes. *Cell Metab*  
694 Mills EL, Kelly B, Logan A, Costa ASH, Varma M, Bryant CE, Tourlomousis P, Däbritz JHM, Gottlieb E,  
695 Latorre I *et al* (2016) Succinate Dehydrogenase Supports Metabolic Repurposing of Mitochondria to  
696 Drive Inflammatory Macrophages. *Cell* 167: 457-470.e413  
697 Mookherjee N, Lippert DN, Hamill P, Falsafi R, Nijnik A, Kindrachuk J, Pistolic J, Gardy J, Miri P,  
698 Naseer M *et al* (2009) Intracellular receptor for human host defense peptide LL-37 in monocytes. *J*  
699 *Immunol* 183: 2688-2696  
700 Moon JS, Hisata S, Park MA, DeNicola GM, Ryter SW, Nakahira K, Choi AMK (2015) mTORC1-Induced  
701 HK1-Dependent Glycolysis Regulates NLRP3 Inflammasome Activation. *Cell Rep* 12: 102-115  
702 Mukherjee S, Chen LY, Papadimos TJ, Huang S, Zuraw BL, Pan ZK (2009) Lipopolysaccharide-driven  
703 Th2 cytokine production in macrophages is regulated by both MyD88 and TRAM. *J Biol Chem* 284:  
704 29391-29398  
705 Murphy MP (2019) Rerouting metabolism to activate macrophages. *Nat Immunol* 20: 1097-1099  
706 Murray PJ, Allen JE, Biswas SK, Fisher EA, Gilroy DW, Goerdts S, Gordon S, Hamilton JA, Ivashkiv LB,  
707 Lawrence T *et al* (2014) Macrophage Activation and Polarization: Nomenclature and Experimental  
708 Guidelines. *Immunity* 41: 14-20  
709 Navid F, Boniotto M, Walker C, Ahrens K, Proksch E, Sparwasser T, Müller W, Schwarz T, Schwarz A  
710 (2012) Induction of regulatory T cells by a murine  $\beta$ -defensin. *J Immunol* 188: 735-743  
711 O'Neill LA, Pearce EJ (2016) Immunometabolism governs dendritic cell and macrophage function. *J*  
712 *Exp Med* 213: 15-23  
713 Perona-Wright G, Mohrs K, Mohrs M (2010) Sustained signaling by canonical helper T cell cytokines  
714 throughout the reactive lymph node. *Nat Immunol* 11: 520-526  
715 Ploeger DT, Houser NA, Schipper M, Koerts JA, de Rond S, Bank RA (2013) Cell plasticity in wound  
716 healing: paracrine factors of M1/ M2 polarized macrophages influence the phenotypical state of  
717 dermal fibroblasts. *Cell Commun Signal* 11: 29  
718 Reijns MA, Rabe B, Rigby RE, Mill P, Astell KR, Lettice LA, Boyle S, Leitch A, Keighren M, Kilanowski F  
719 *et al* (2012) Enzymatic removal of ribonucleotides from DNA is essential for mammalian genome  
720 integrity and development. *Cell* 149: 1008-1022  
721 Rohrl J, Yang D, Oppenheim JJ, Hehlhans T (2010) Human beta-defensin 2 and 3 and their mouse  
722 orthologs induce chemotaxis through interaction with CCR2. *J Immunol* 184: 6688-6694

- 723 Ryan DG, Murphy MP, Frezza C, Prag HA, Chouchani ET, O'Neill LA, Mills EL (2019) Coupling Krebs  
724 cycle metabolites to signalling in immunity and cancer. *Nat Metab* 1: 16-33
- 725 Ruckerl D, Campbell SM, Duncan S, Sutherland TE, Jenkins SJ, Hewitson JP, Barr TA, Jackson-Jones  
726 LH, Maizels RM, Allen JE (2017) Macrophage origin limits functional plasticity in helminth-bacterial  
727 co-infection. *PLoS Pathog* 13: e1006233
- 728 Schutte BC, Mitros JP, Bartlett JA, Walters JD, Jia HP, Welsh MJ, Casavant TL, McCray PB, Jr. (2002)  
729 Discovery of five conserved beta -defensin gene clusters using a computational search strategy.  
730 *ProcNatAcadSciUSA* 99: 2129-2133
- 731 Semple F, MacPherson H, Webb S, Cox SL, Mallin LJ, Tyrrell C, Grimes GR, Semple CA, Nix MA,  
732 Millhauser GL *et al* (2011) Human beta-defensin 3 affects the activity of pro-inflammatory pathways  
733 associated with MyD88 and TRIF. *EurJImmunol* 41: 3291-3300
- 734 Semple F, MacPherson H, Webb S, Kilanowski F, Lettice L, McGlasson SL, Wheeler AP, Chen V,  
735 Millhauser GL, Melrose L *et al* (2015) Human  $\beta$ -D-3 Exacerbates MDA5 but Suppresses TLR3  
736 Responses to the Viral Molecular Pattern Mimic Polyinosinic:Polycytidylic Acid. *PLoS Genet* 11:  
737 e1005673
- 738 Semple F, Webb S, Li HN, Patel HB, Perretti M, Jackson IJ, Gray M, Davidson DJ, Dorin JR (2010)  
739 Human beta-defensin 3 has immunosuppressive activity in vitro and in vivo. *EurJImmunol* 40: 1073-  
740 1078
- 741 Shelley JR, Davidson DJ, Dorin JR (2020) The Dichotomous Responses Driven by  $\beta$ -Defensins. *Front*  
742 *Immunol* 11: 1176
- 743 Shirey KA, Pletneva LM, Puche AC, Keegan AD, Prince GA, Blanco JC, Vogel SN (2010) Control of RSV-  
744 induced lung injury by alternatively activated macrophages is IL-4R alpha-, TLR4-, and IFN-beta-  
745 dependent. *Mucosal Immunol* 3: 291-300
- 746 Sun J, Furio L, Mecheri R, van der Does AM, Lundeberg E, Saveanu L, Chen Y, van Endert P, Agerberth  
747 B, Diana J (2015) Pancreatic  $\beta$ -Cells Limit Autoimmune Diabetes via an Immunoregulatory  
748 Antimicrobial Peptide Expressed under the Influence of the Gut Microbiota. *Immunity* 43: 304-317
- 749 Tannahill GM, Curtis AM, Adamik J, Palsson-McDermott EM, McGettrick AF, Goel G, Frezza C,  
750 Bernard NJ, Kelly B, Foley NH *et al* (2013) Succinate is an inflammatory signal that induces IL-1 $\beta$   
751 through HIF-1 $\alpha$ . *Nature* 496: 238-242
- 752 Tewary P, de la Rosa G, Sharma N, Rodriguez LG, Tarasov SG, Howard OM, Shirota H, Steinhagen F,  
753 Klinman DM, Yang D *et al* (2013)  $\beta$ -Defensin 2 and 3 Promote the Uptake of Self or CpG DNA,  
754 Enhance IFN- $\alpha$  Production by Human Plasmacytoid Dendritic Cells, and Promote Inflammation. *J*  
755 *Immunol*
- 756 Van den Bossche J, Baardman J, Otto NA, van der Velden S, Neele AE, van den Berg SM, Luque-  
757 Martin R, Chen HJ, Boshuizen MC, Ahmed M *et al* (2016) Mitochondrial Dysfunction Prevents  
758 Repolarization of Inflammatory Macrophages. *Cell Rep* 17: 684-696
- 759 Viola A, Munari F, Sánchez-Rodríguez R, Sclaro T, Castegna A (2019) The Metabolic Signature of  
760 Macrophage Responses. *Front Immunol* 10: 1462
- 761 Wang F, Zhang S, Vuckovic I, Jeon R, Lerman A, Folmes CD, Dzeja PP, Herrmann J (2018) Glycolytic  
762 Stimulation Is Not a Requirement for M2 Macrophage Differentiation. *Cell Metab* 28: 463-475.e464
- 763 Williams H, Campbell L, Crompton RA, Singh G, McHugh BJ, Davidson DJ, McBain AJ, Cruickshank SM,  
764 Hardman MJ (2018) Microbial Host Interactions and Impaired Wound Healing in Mice and Humans:  
765 Defining a Role for BD14 and NOD2. *J Invest Dermatol* 138: 2264-2274
- 766 Wu Z, Hoover DM, Yang D, Boulegue C, Santamaria F, Oppenheim JJ, Lubkowski J, Lu W (2003)  
767 Engineering disulfide bridges to dissect antimicrobial and chemotactic activities of human beta-  
768 defensin 3. *ProcNatAcadSciUSA* 100: 8880-8885
- 769 Yang D, Wei F, Tewary P, Howard OM, Oppenheim JJ (2013) Alarmin-induced cell migration. *Eur J*  
770 *Immunol* 43: 1412-1418
- 771 Zhang D, Tang Z, Huang H, Zhou G, Cui C, Weng Y, Liu W, Kim S, Lee S, Perez-Neut M *et al* (2019)  
772 Metabolic regulation of gene expression by histone lactylation. *Nature* 574: 575-580

774 **Acknowledgements**

775 Flow cytometry data was generated with support from the QMRI Flow Cytometry and  
776 cell sorting facility, University of Edinburgh. We thank Drs. Dietmar Zaiss and Pieter  
777 Louwe for valuable discussions. We would also like to thank staff at the BVS for  
778 expert technical assistance. This work was supported by MRC Human Genetics Unit  
779 core award to JRD 2010-15 and Medical Research Council UK grant  
780 (MR/P02338X/1) awarded to JRD and NMN. BJM supported by MRC SHIELD  
781 consortium MR/N02995X/1 grant award to DJD.

782  
783 M.E.C. designed and performed most experiments, analysed and interpreted the  
784 data,. D.J.P.A performed experiments and contributed to discussion, R.N.C. assisted  
785 and oversaw Seahorse experiments and analysed data F.S. performed experiments  
786 and contributed to discussion, F.K. performed ES cell targeting, S.W. performed  
787 experiments, D.T. assisted in analysis of Flow Cytometry data, H.J.W.M. carried out  
788 the human cell experiments, B.J.M. supervised human cell experiments and  
789 analysis, D.H.D. supervised the human experiments and contributed to design,  
790 D.J.D. and J.E.A. provided critical feedback, S.J.J. assisted with data interpretation  
791 and critiqued the manuscript for intellectual content. N.M. and J.R.D. conceived,  
792 designed, and supervised the project, JRD interpreted the data and wrote the  
793 manuscript.
